# Supplementary material
Source: publisher site journal article supplement (https://www.dovepress.com/article/466479)
Supplement: Supplementary file 1 [file get_supplementary_file.php]

**Supplementary Table 1. List of central independent ethics committees or institutional review boards used by all investigators except those who were required to use their local IRB.**

| **Name of ethics committee or institutional review boards** |
| --- |
| National Agency for Medicines and Medical Devices, Romania |
| Comisia Naţională de Bioetică a Medicamentului, Romania |
| Bioethics Committee at the Okręgowa Izba Lekarska in Łódź, Poland |
| Ethical Council at the MoH of RF, Russia |
| State Expert Center of the Ministry of Health of Ukraine, Ukraine |

**Supplementary Table 2. List of ethics committees or institutional review boards used by the investigators**

| **Name of ethics committee or institutional review boards** |
| --- |
| Aichi Medical Association IRB, Japan |
| Jintokukai Sakayori Clinic IRB, Japan |
| Jisenkai Nanko Psychiatric Institute IRB Japan |
| Yoyogi Mental Clinic IRB, Japan |
| Dr.Mano Medical Clinic IRB, Japan |
| Sankeikai Nishigahara HospitaI IRB, Japan |
| Asai Dermatology Clinic IRB, Japan |
| NHO Hizen Psychiatric Center IRB, Japan |
| Osaka Medical Association IRB, Japan |
| Asakayama General Hospital IRB |
| Fujita Health University Hospital IRB, Japan |
| Ekihigashi Hifuka Clinic IRB, Japan |
| Zenshukai Hospital IRB, Japan |
| Hakuseikai Aoki Hospital IRB, Japan |
| Shiosakikai Ino Hospital IRB, Japan |
| Sakurazaka Circulatory Clinic IRB, Japan |
| National Center of Neurology and Psychiatry IRB, Japan |
| Aichi Medical University Hospital IRB, Japan |
| LEC of SPBSHI "Psychiatric Hospital #1 n.a. P.P.Kaschenko", Russia |
| LEC at SPB SR Psychoneurological Inst. n.a.V.M.Bekhterev of MoH, Russia |
| LIEC at SBHI “Chelyabinsk Region Clinical Hospital”, Russia |
| LEC at Msc Scientific Research Inst. of Psychiatry, Russia |
| EC at "Saratov Regional Psychiatry Hospital of St. Sofia", Russia |
| EC of the SBHI “Sverdlovsk Regional Clinical Psychiatric Hospital”, Russia |
| LEC at SHI "Psychiatric hospital #1 n. a. N.A. Alexeev", Russia |
| LEC at JSC “Scientific Centre of Personalized Medicine", Russia |
| EC of BHIOR “Clinical Psychiatric Hospital n.a. N.N. Solodnikov”, Russia |
| LEC Kyiv City Psychoneurological Hospital #2, Ukraine |
| LEC CI Cherkasy Reg.Psych.Hospital, Ukraine |
| LEC Kharkiv Reg.Clin.Psych.Hosp.#3, Ukraine |
| LEC State Institution Institute of Neurology, Psychiatry and Narcology of NAMSU, Ukraine |
| LEC Regional Psychoneurological Hospital #3, Ukraine |
| LEC CI Kherson Regional Psychiatric Hospital, Ukraine |
| LEC Regional Psychoneurological Hospital #1, Ukraine |
| LEC CI " Lviv Regional Clinical Psychiatric Hospital", Ukraine |
| LEC Communal Institution of Kyiv Regional Council: Regional Psychiatric-Narcolo, Ukraine |
| LEC TMA Psychiatry in Kyiv, Ukraine |
| LEC CI Odesa Regional Psychiatric Hospital №2, Ukraine |
| LEC Transcarpathian Regional Narcological Dispensary, Ukraine |
